# Supplementary figures and images for: A neural circuit for flexible control of persistent behavioral states
Source: eLife journal article supplement (doi:10.7554/elife.62889), 2021-11-18

**A**

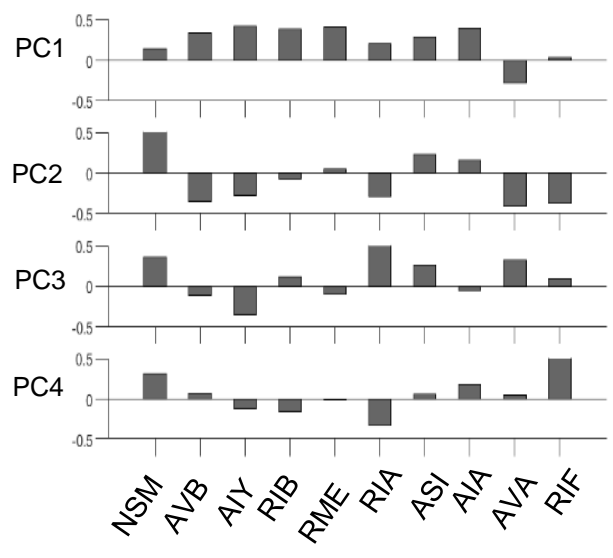

**B**

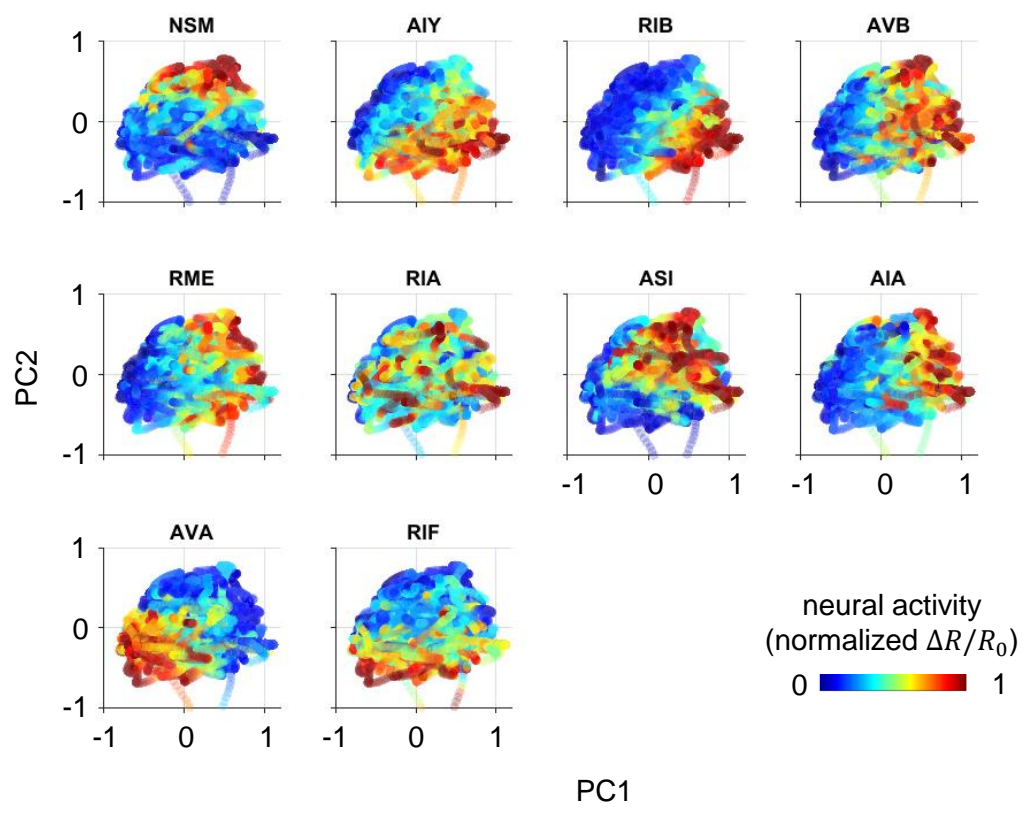

**Figure 1 – Figure Supplement 7**

Supplement: supp [file elife-62889-supp-v1.zip]

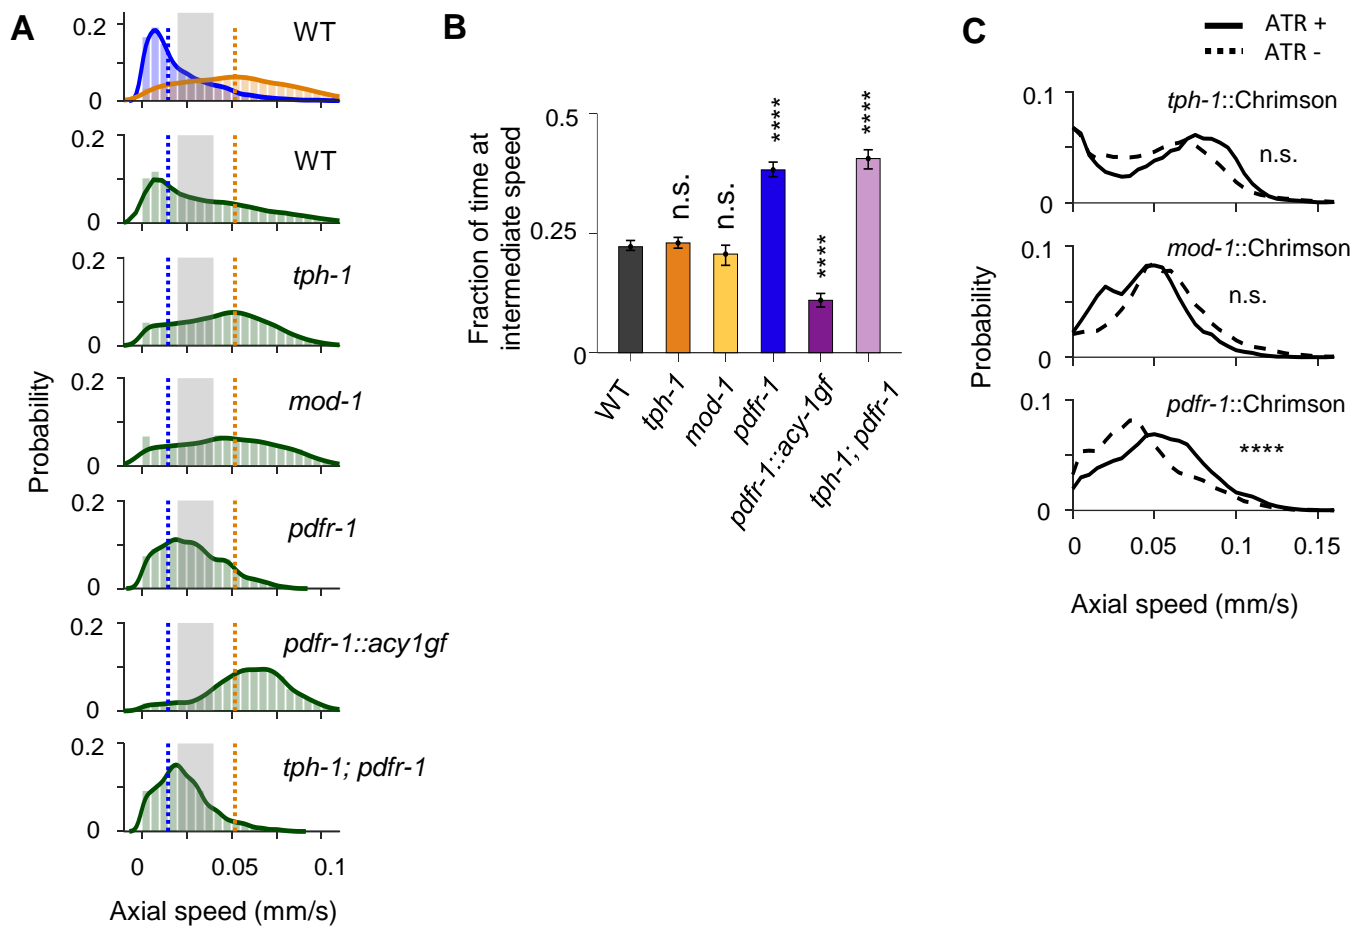

**Figure 4 – Figure Supplement 5**

Supplement: supp [file elife-62889-supp-v1.zip]

**A****Dwelling onset**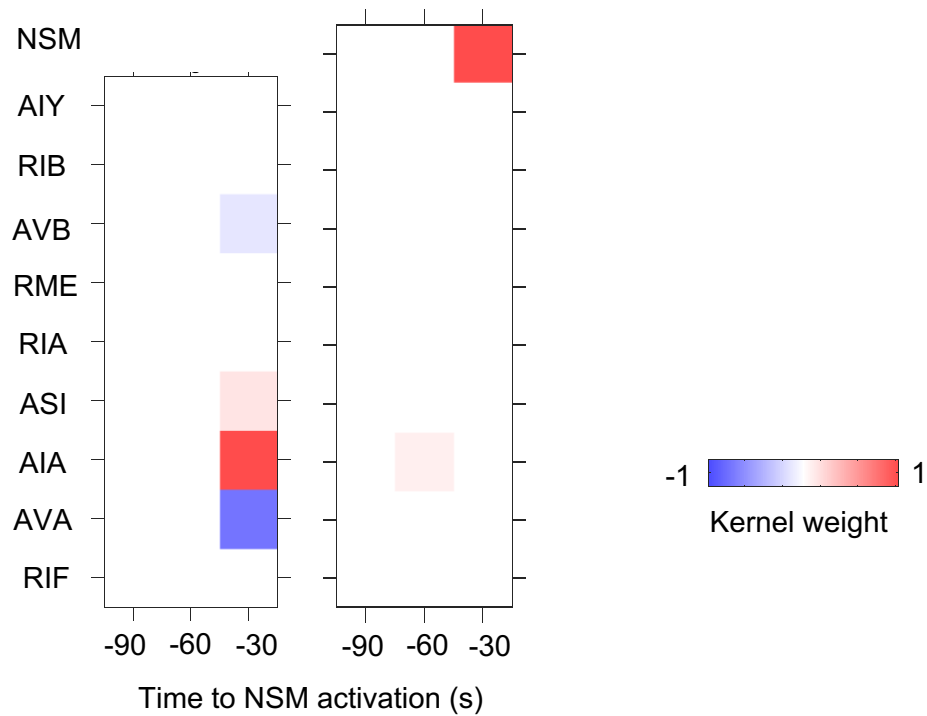**B****Roaming onset**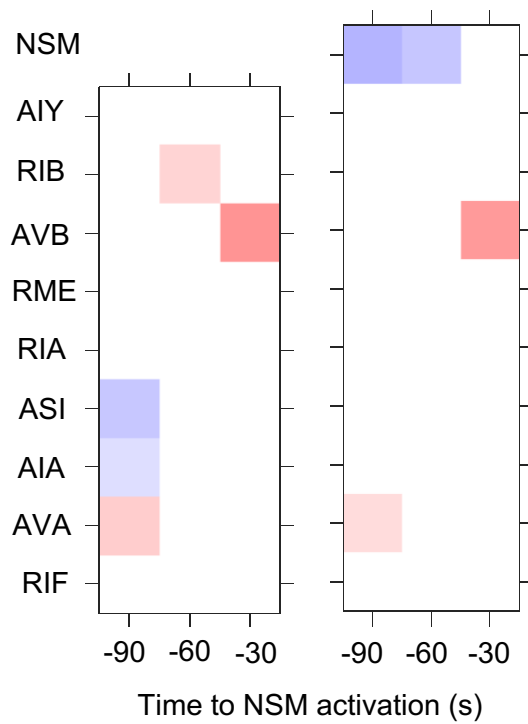**C****NSM OFF**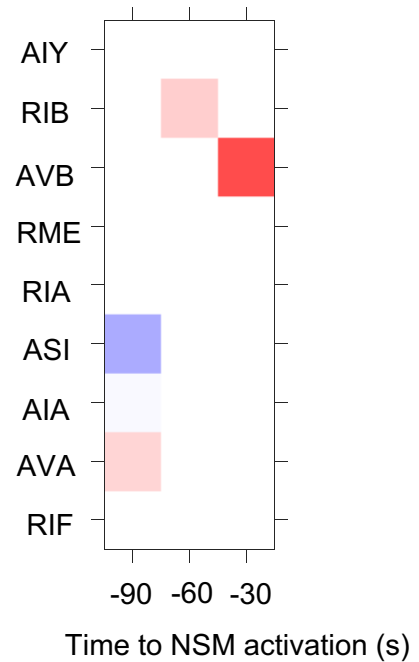**Figure 5 – Figure Supplement 3**

Supplement: supp [file elife-62889-supp-v1.zip]

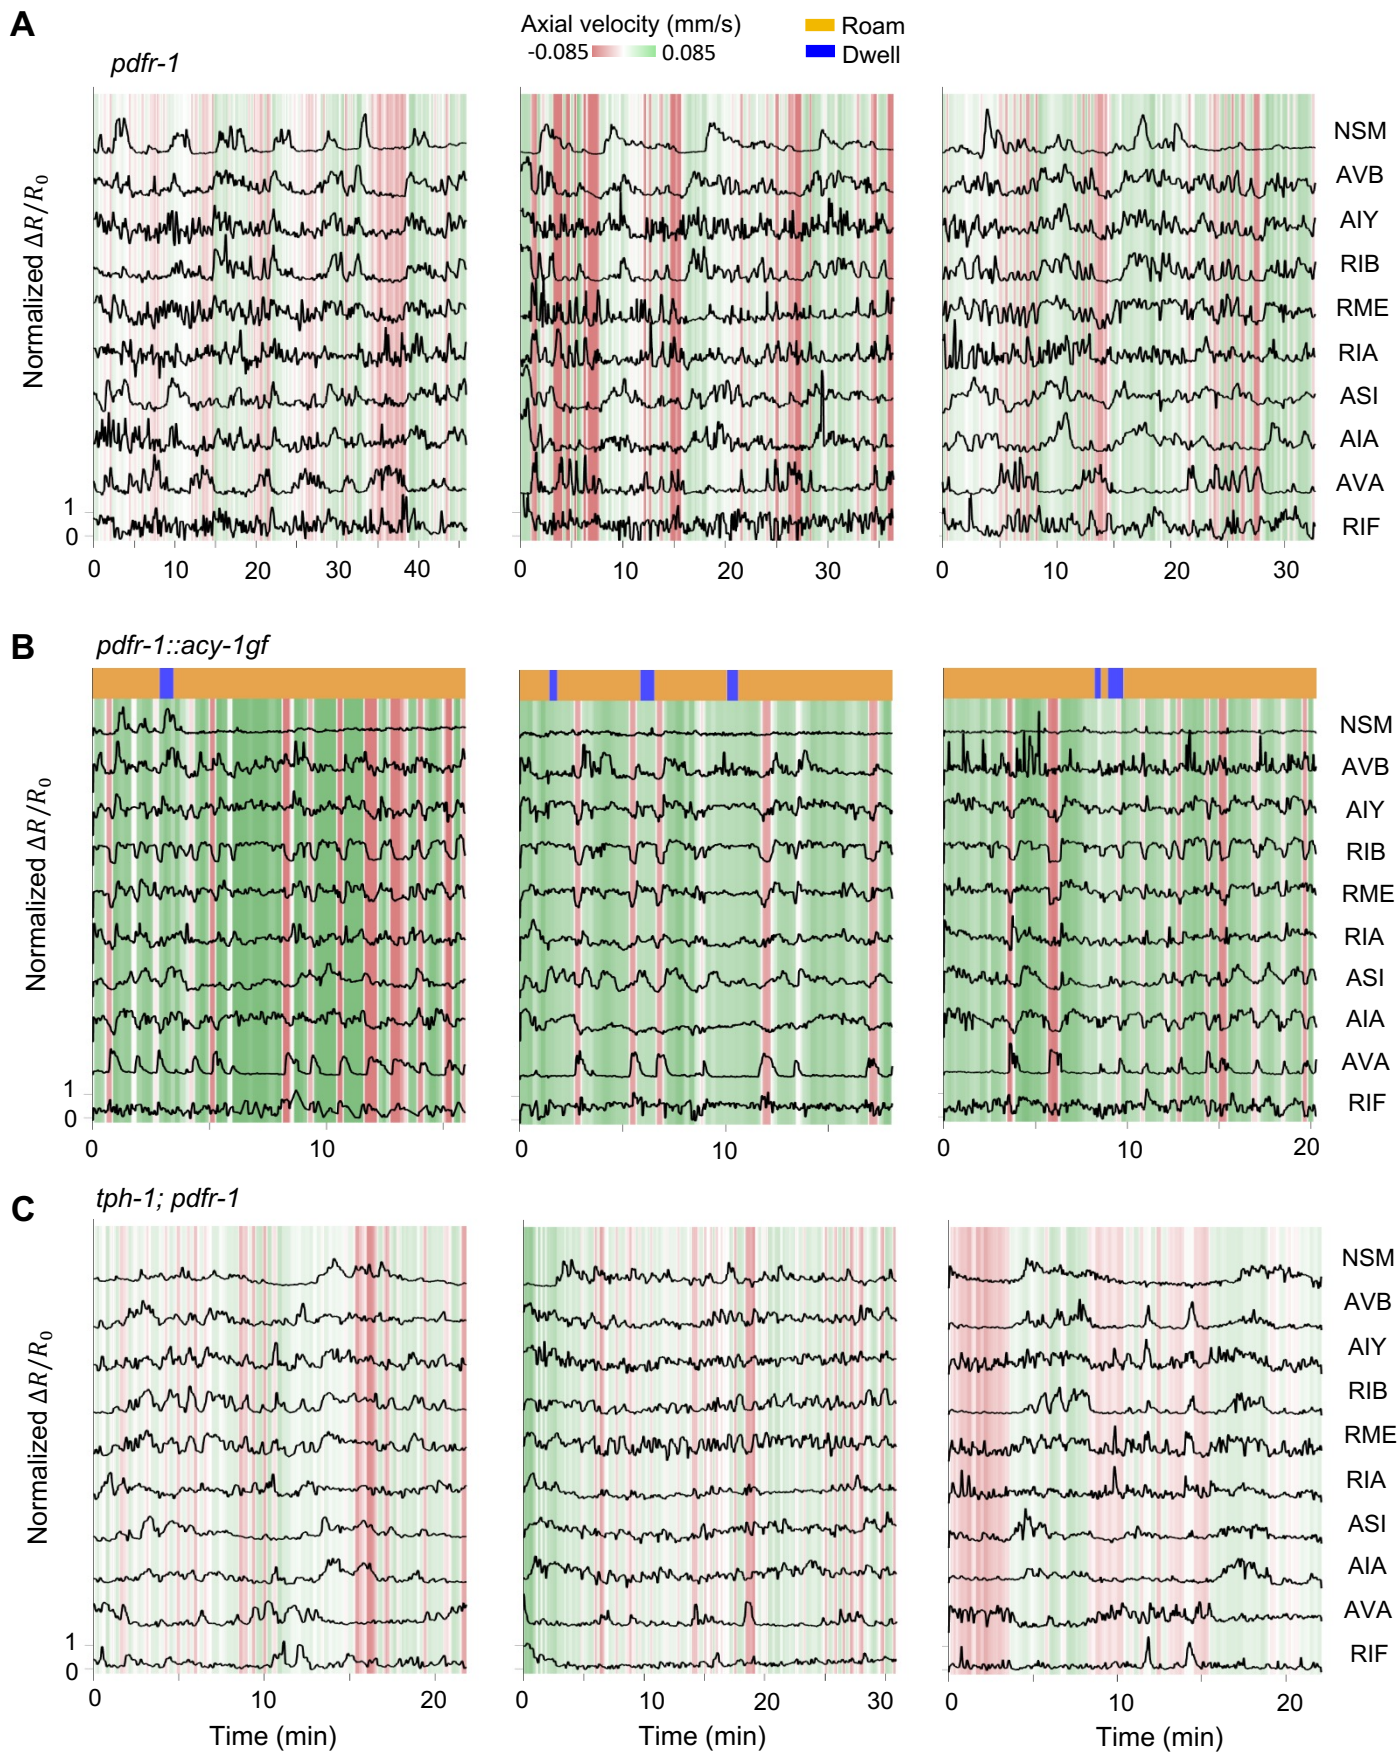

**Figure 4 – Figure Supplement 1**

Supplement: supp [file elife-62889-supp-v1.zip]

**A**

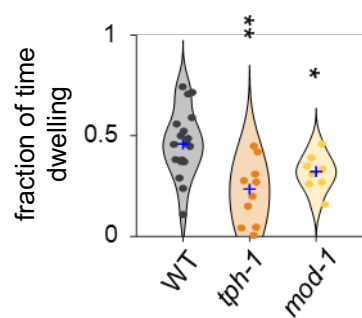

**Figure 3 – Figure Supplement 1**

Supplement: supp [file elife-62889-supp-v1.zip]

**A**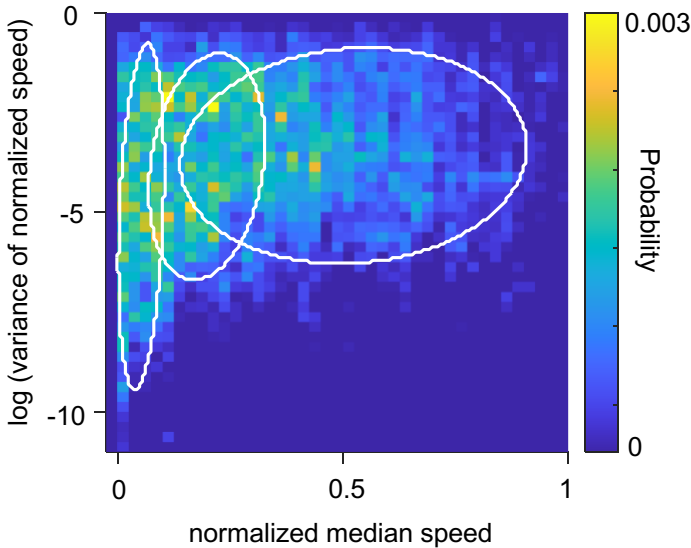**B**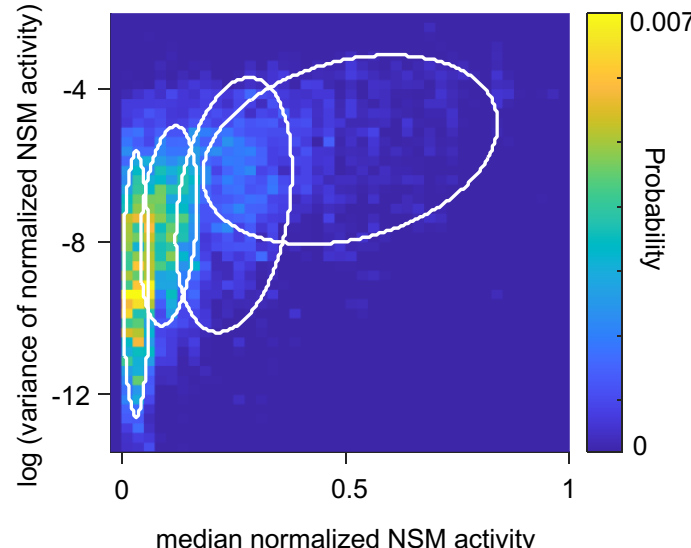

**Figure 1 – Figure Supplement 4**

Supplement: supp [file elife-62889-supp-v1.zip]

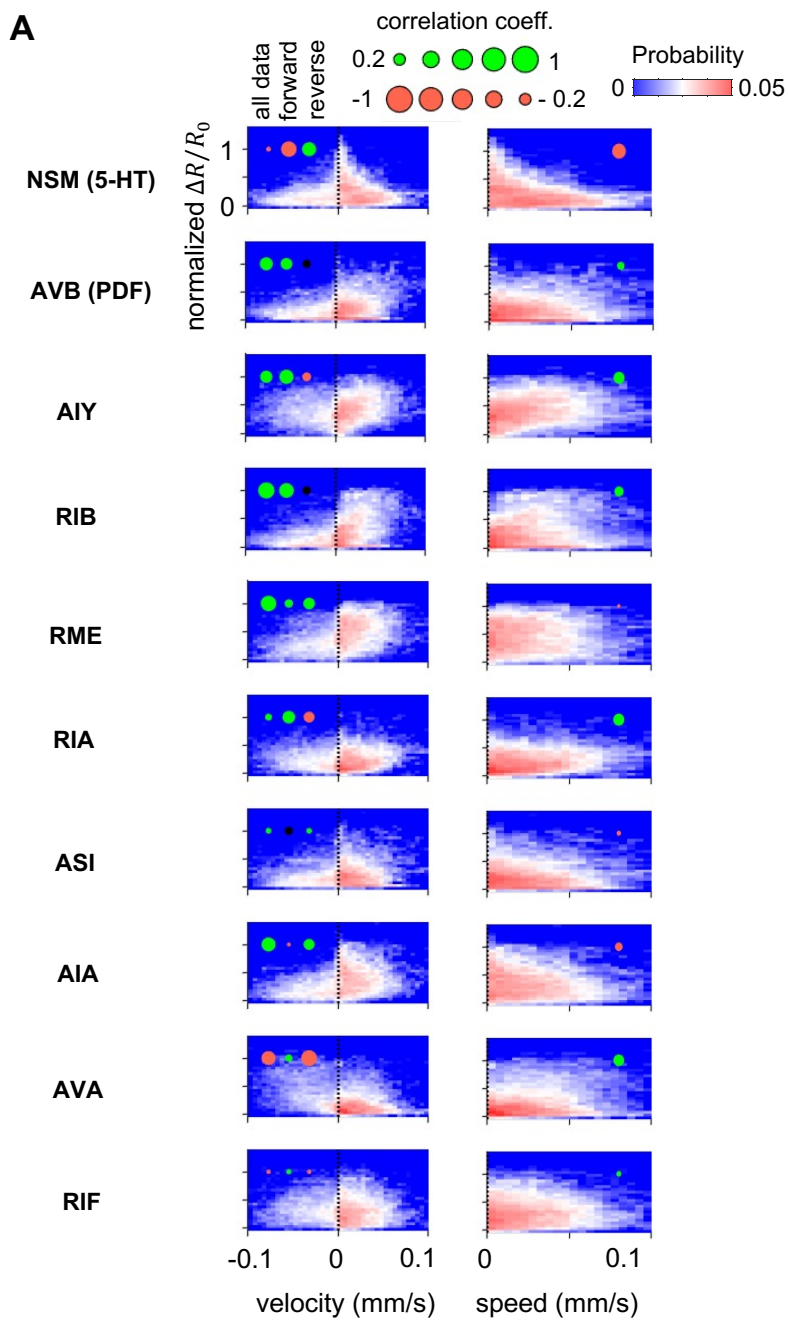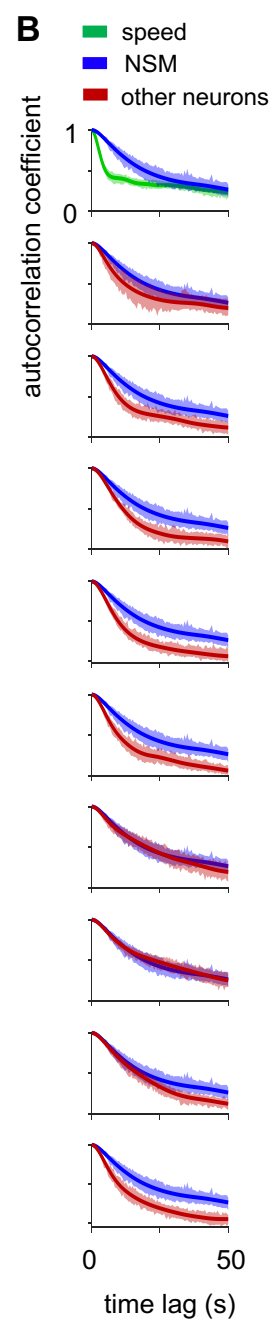

**Figure 1 – Figure Supplement 5**

Supplement: supp [file elife-62889-supp-v1.zip]

**A**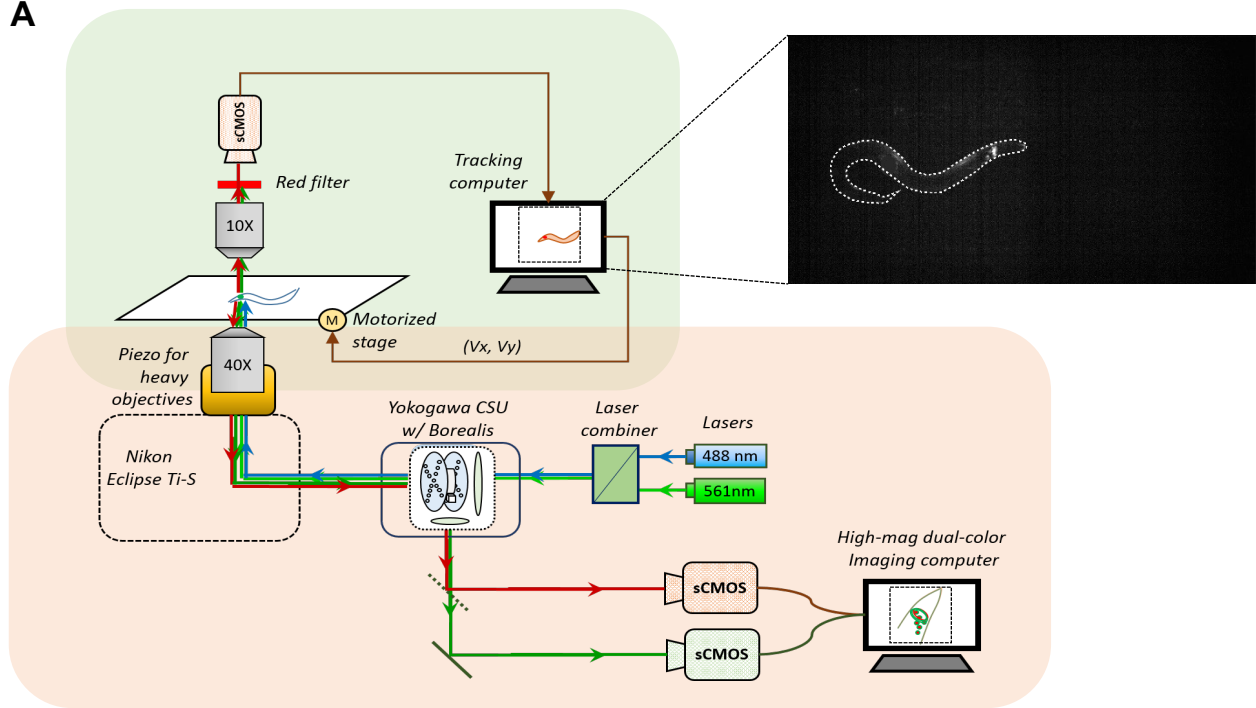**B**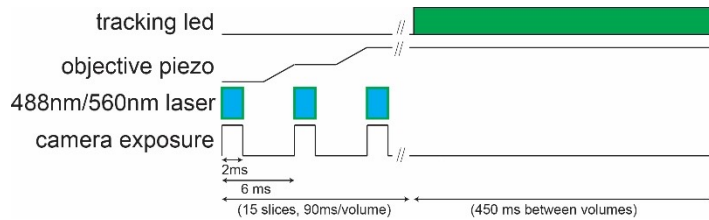**C**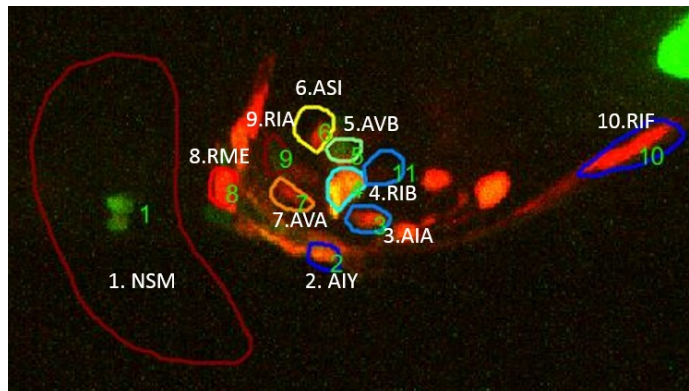**D**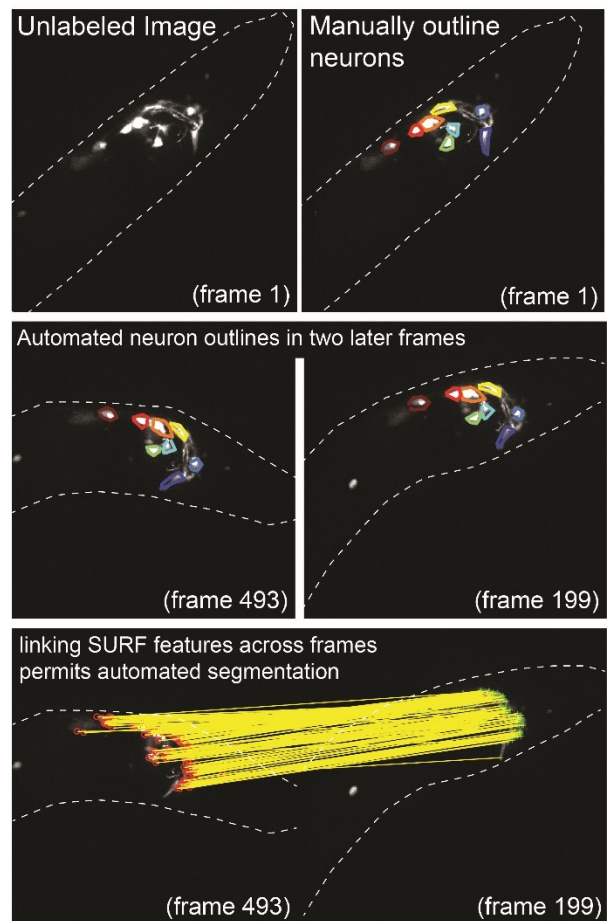

**Figure 1 – Figure Supplement 1**

Supplement: supp [file elife-62889-supp-v1.zip]

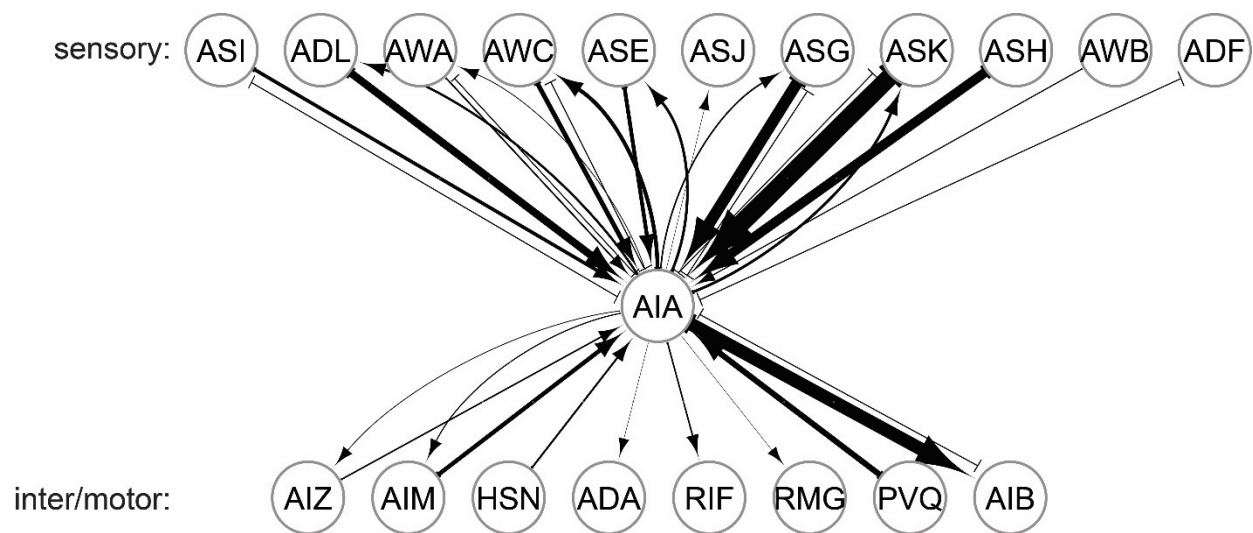

**Figure 6 – Figure Supplement 1**

Supplement: supp [file elife-62889-supp-v1.zip]

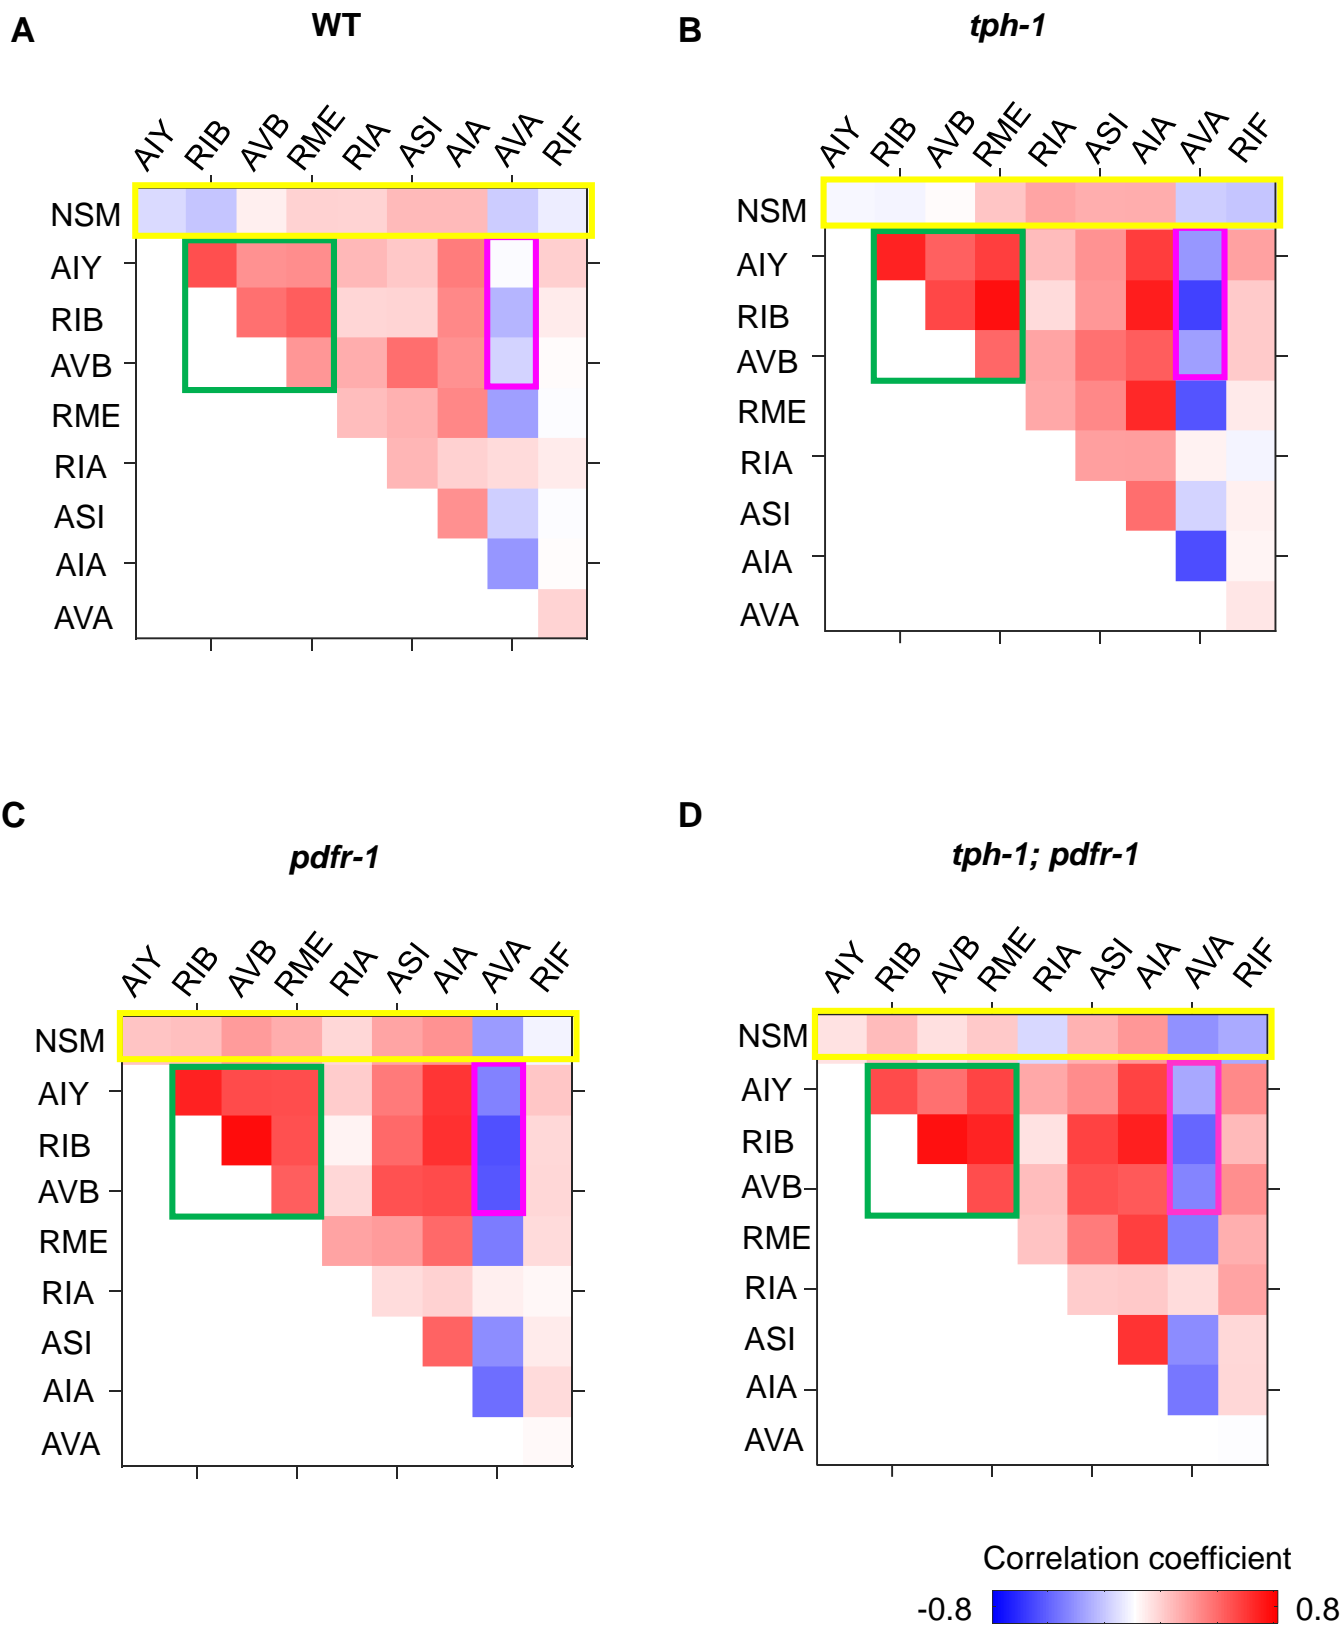

**Figure 4 – Figure Supplement 3**

Supplement: supp [file elife-62889-supp-v1.zip]

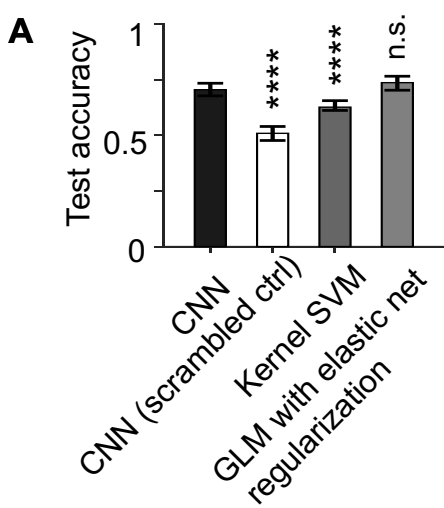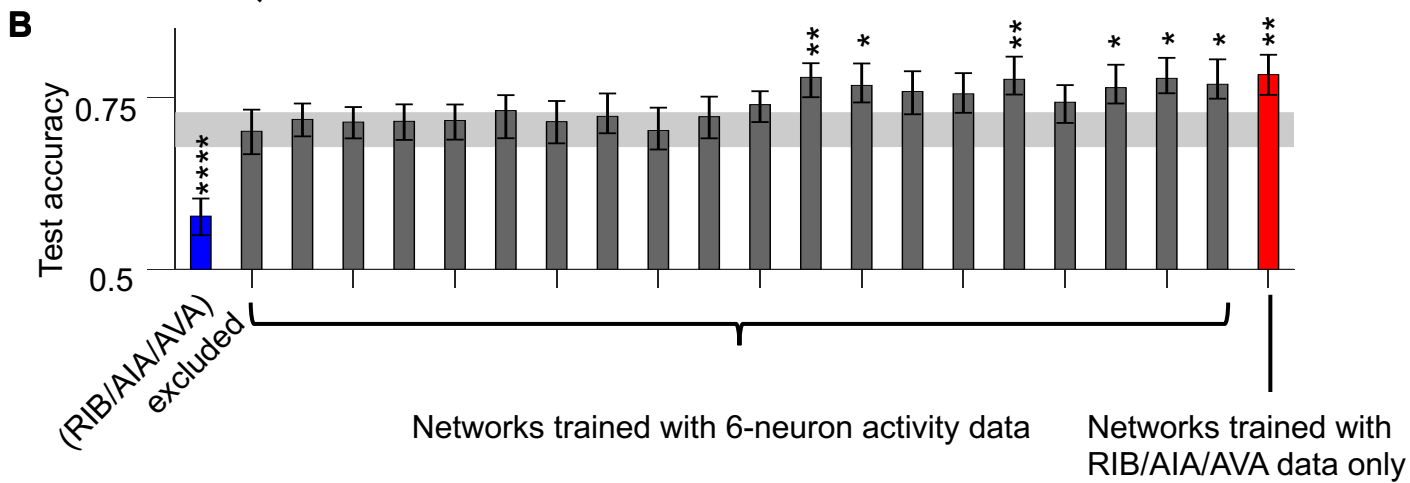

Figure 5 – Figure Supplement 2

Supplement: supp [file elife-62889-supp-v1.zip]

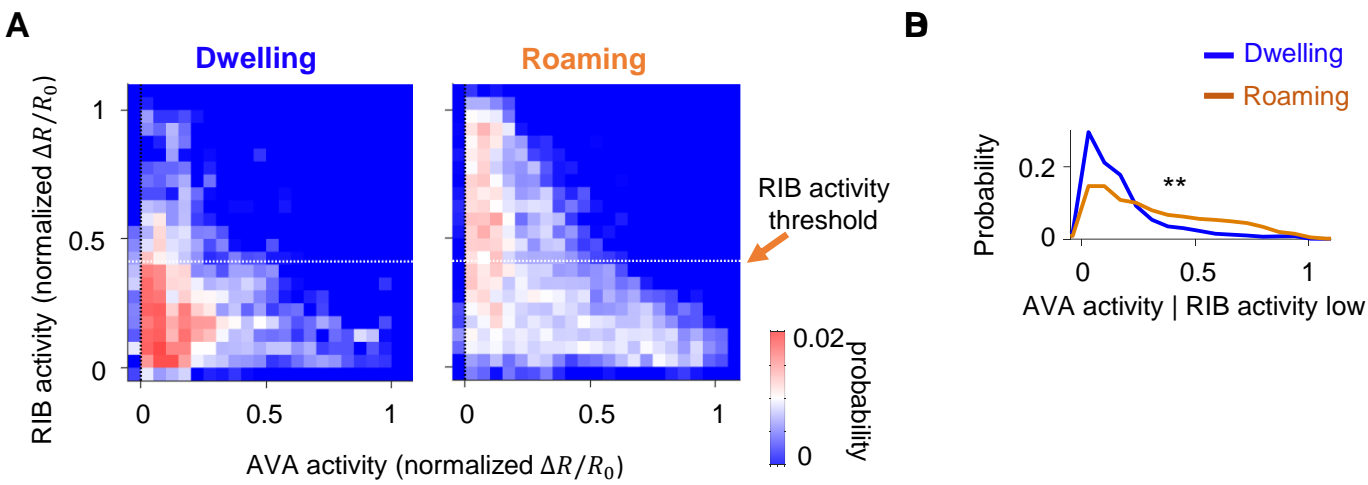

**Figure 1 – Figure Supplement 6**

Supplement: supp [file elife-62889-supp-v1.zip]

# A

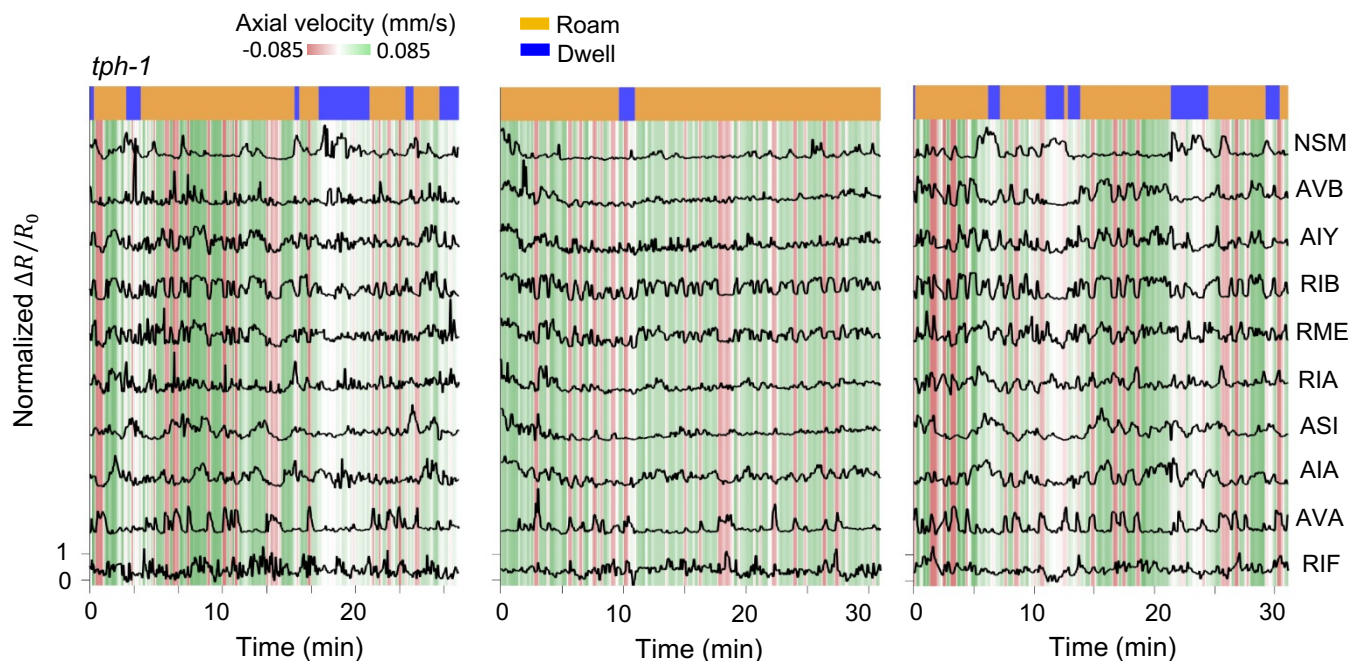

# B

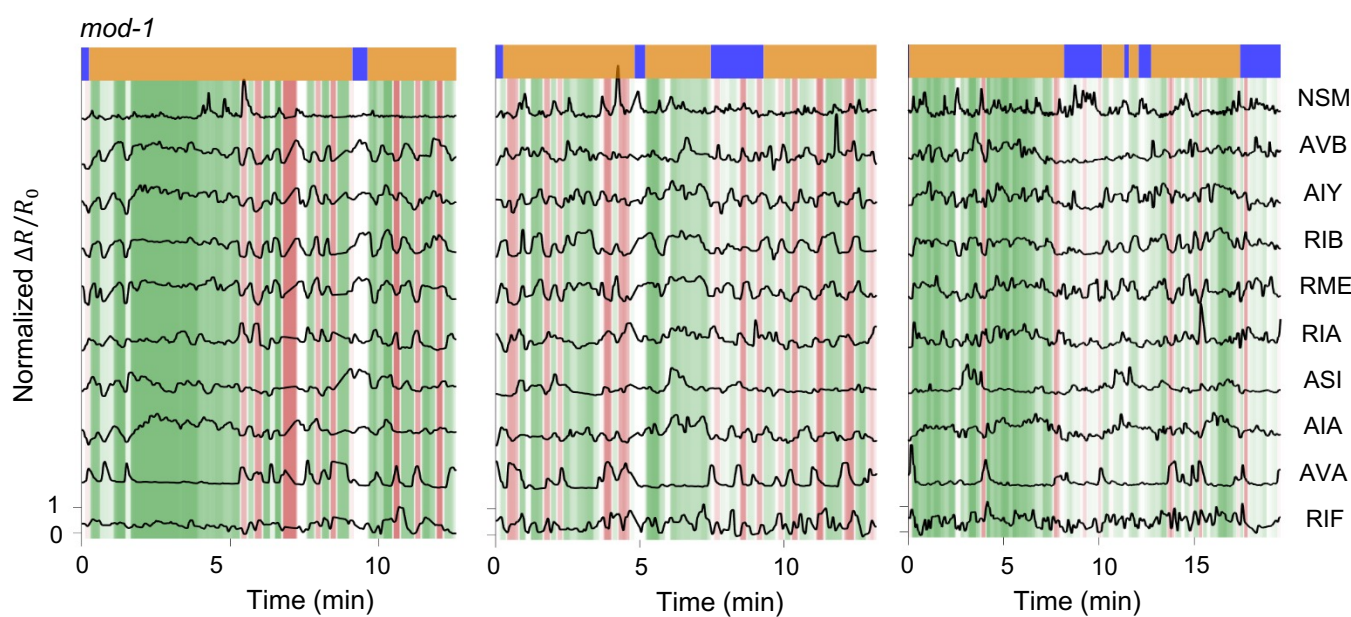

### Figure 3 – Figure Supplement 2

Supplement: supp [file elife-62889-supp-v1.zip]

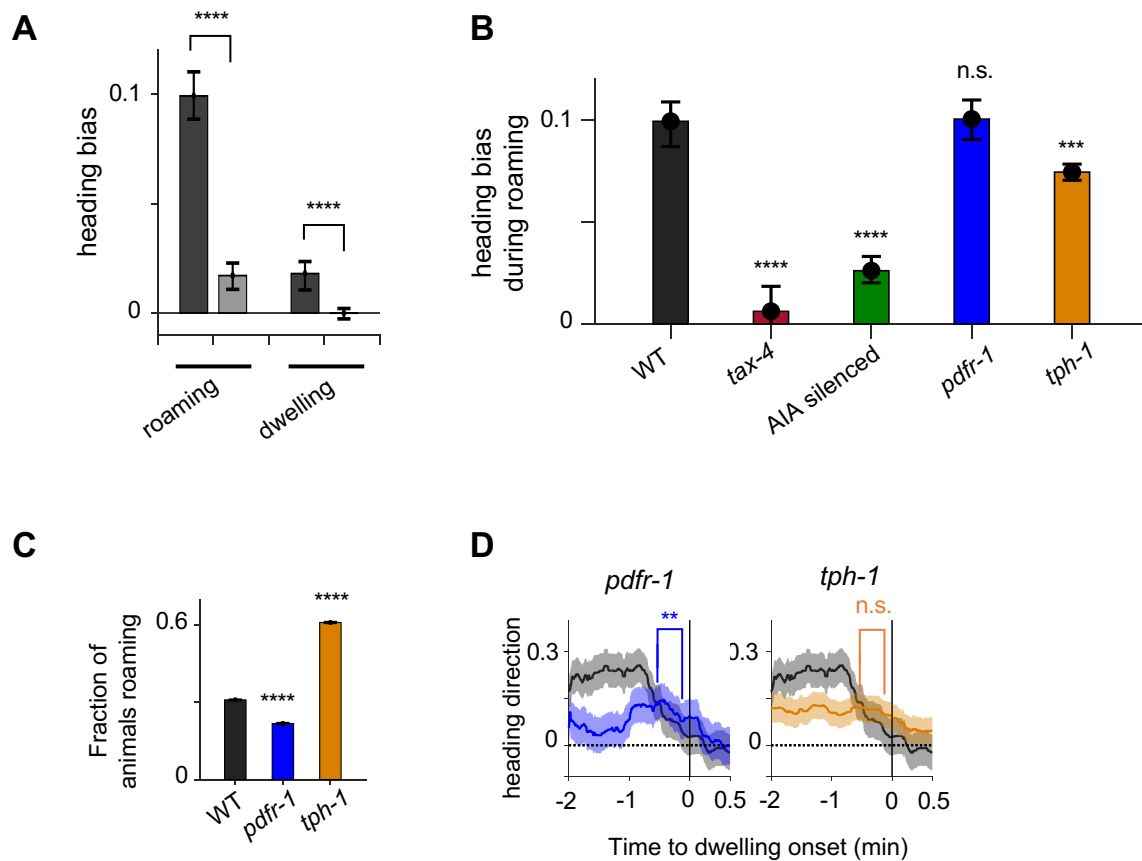

Figure 7 – Figure Supplement 1

Supplement: supp [file elife-62889-supp-v1.zip]

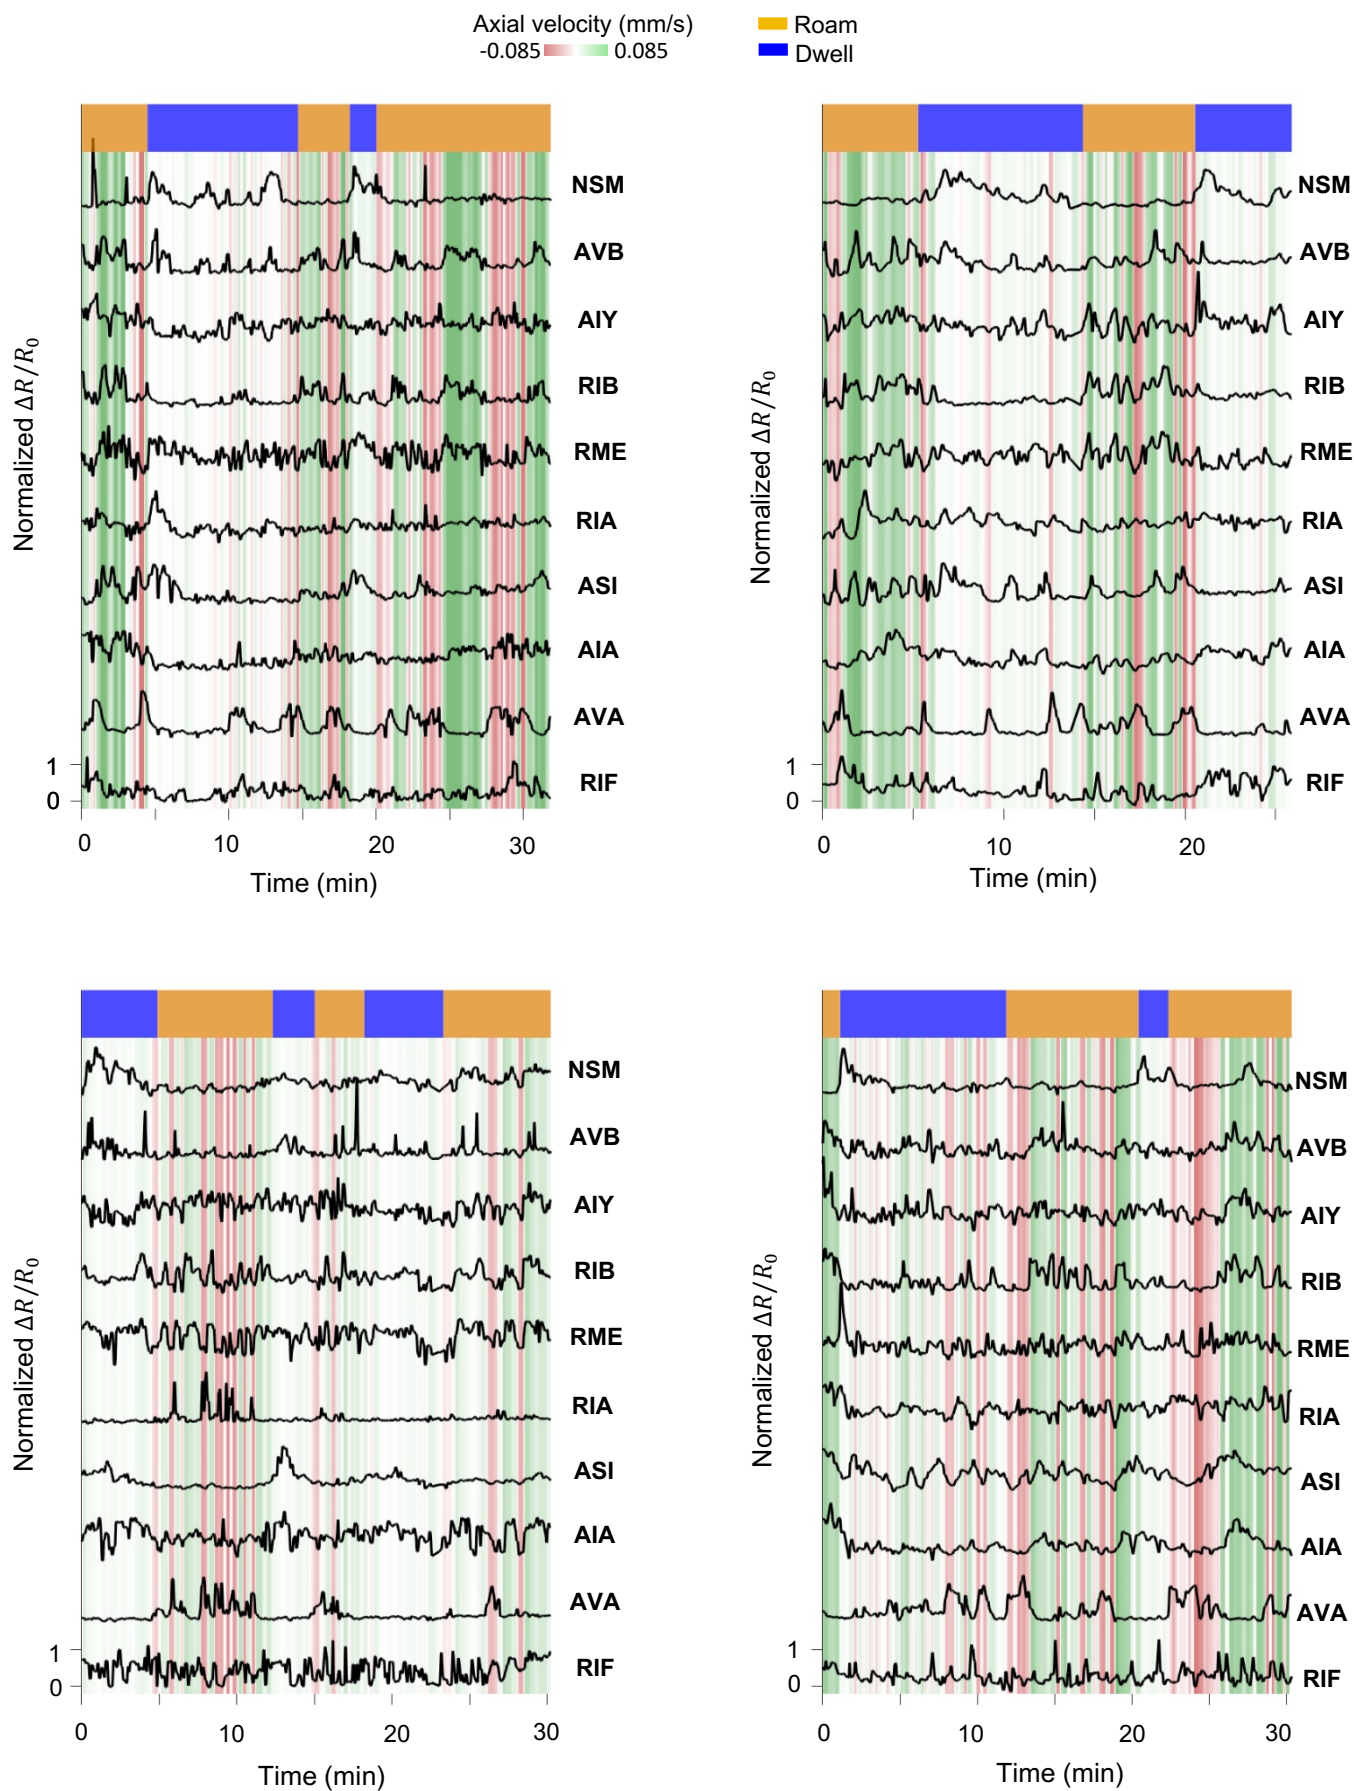

**Figure 1 – Figure Supplement 3**

Supplement: supp [file elife-62889-supp-v1.zip]

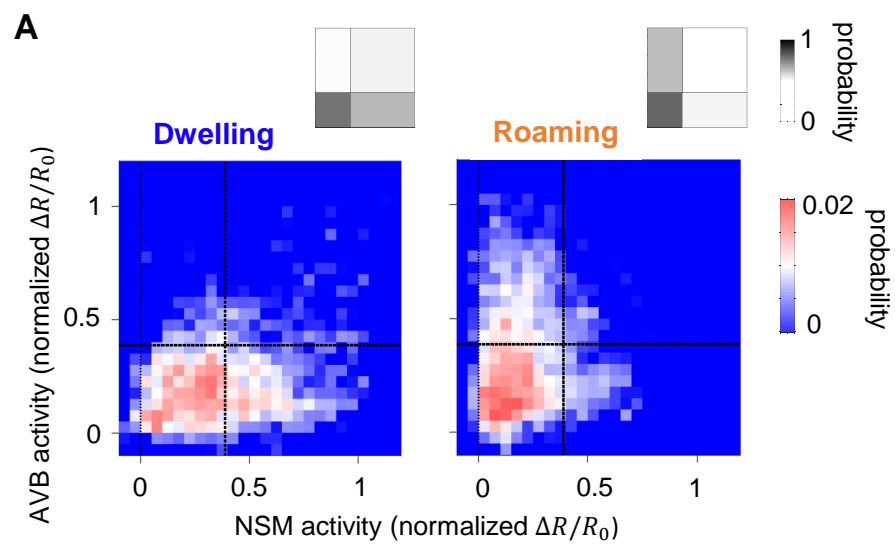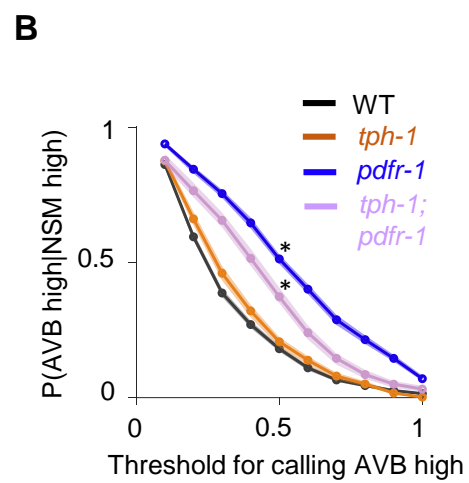

Figure 4 – Figure Supplement 2

Supplement: supp [file elife-62889-supp-v1.zip]

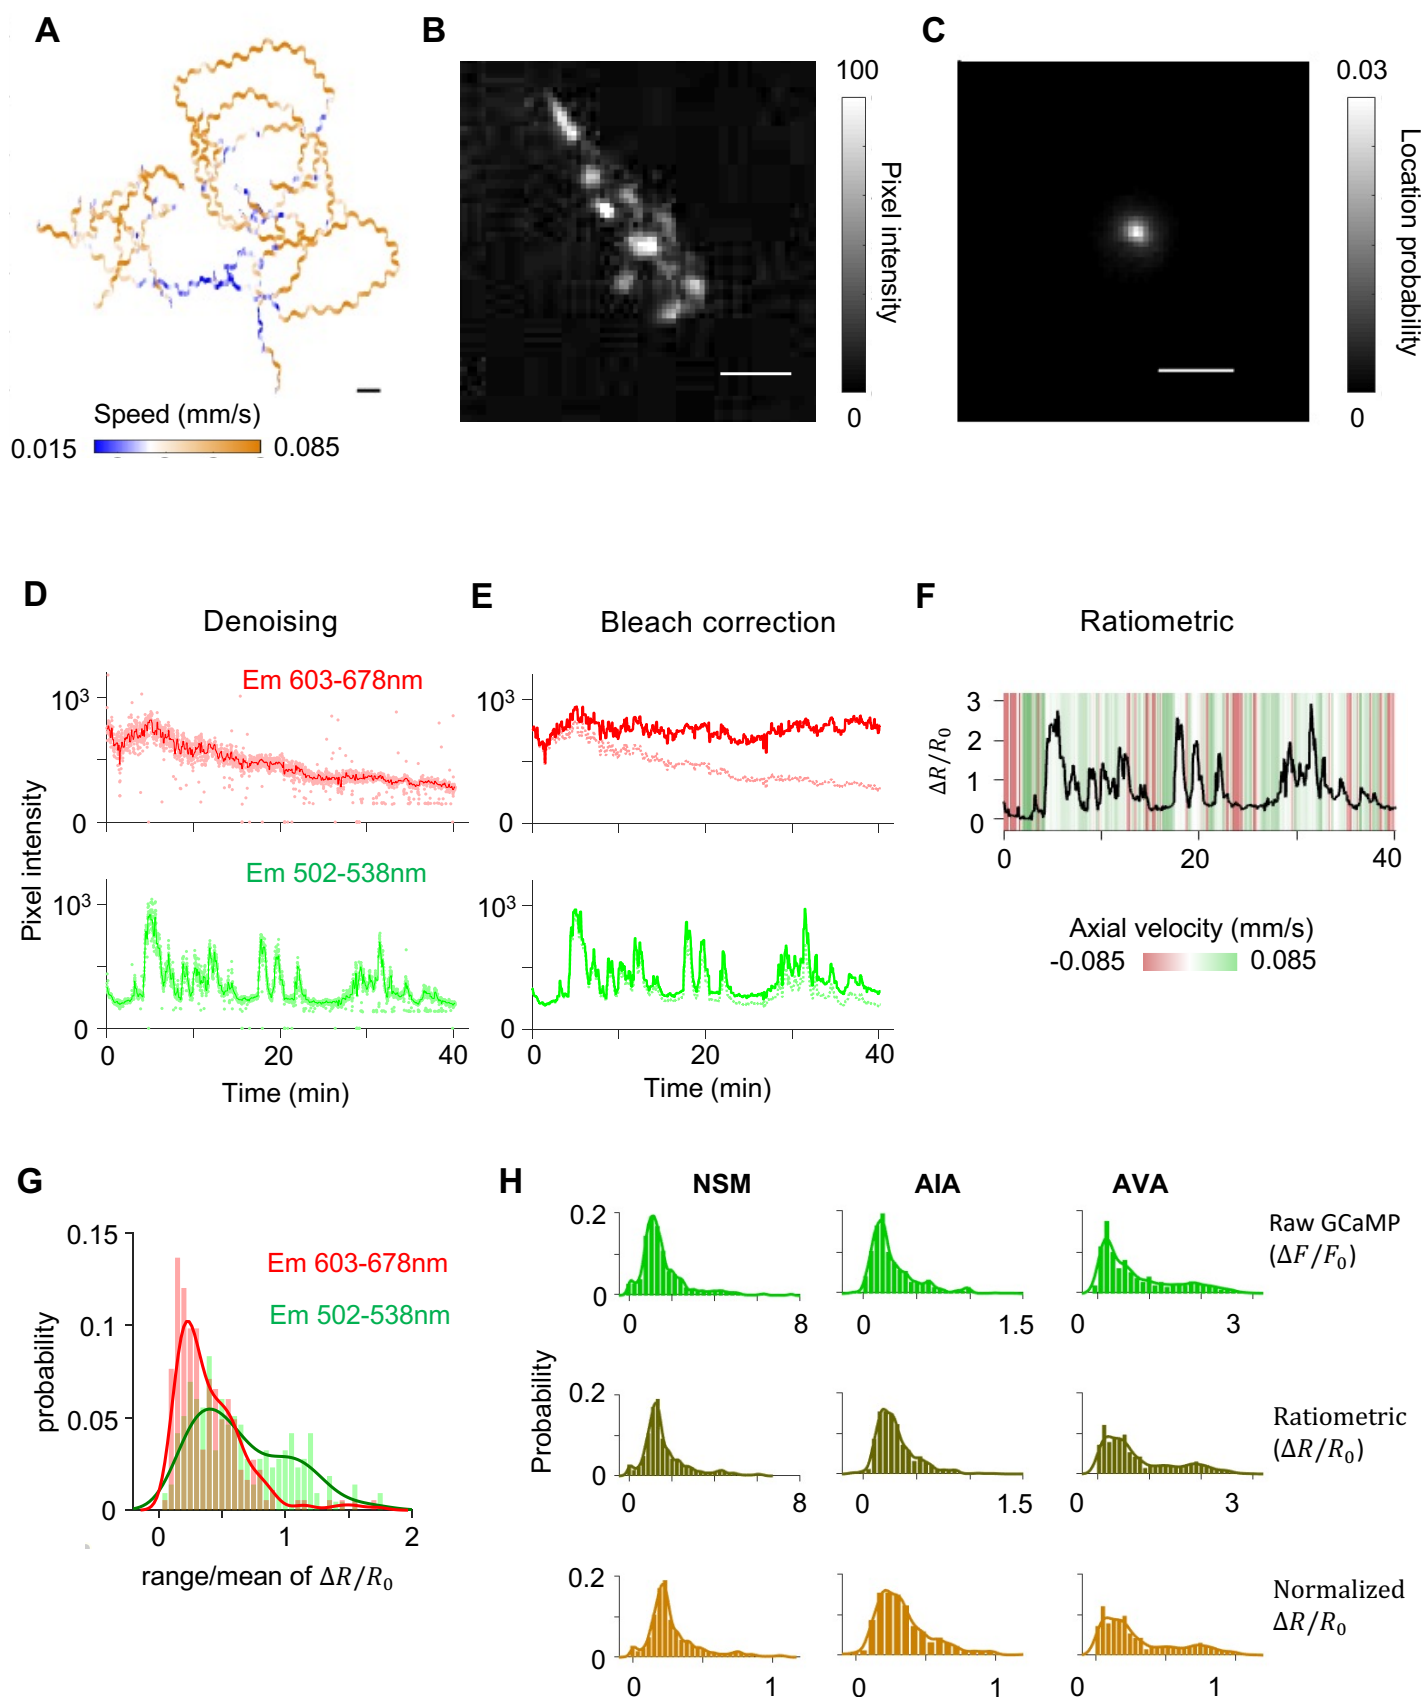

**Figure 1 – Figure Supplement 2**

Supplement: supp [file elife-62889-supp-v1.zip]

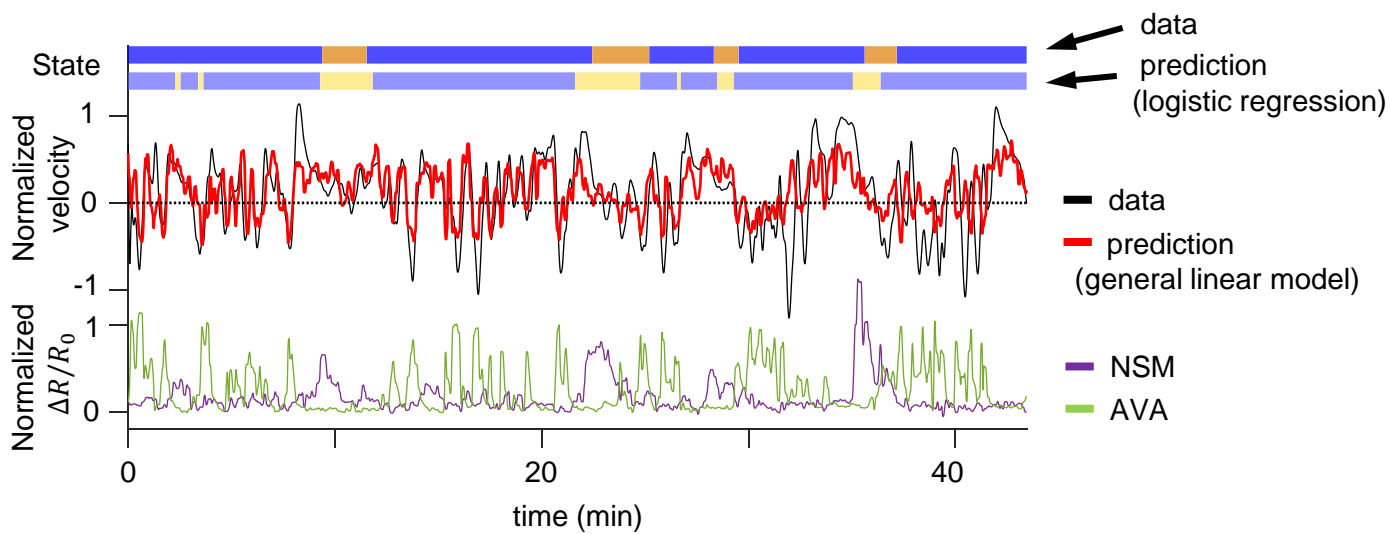

**Figure 1 – Figure Supplement 8**

Supplement: supp [file elife-62889-supp-v1.zip]

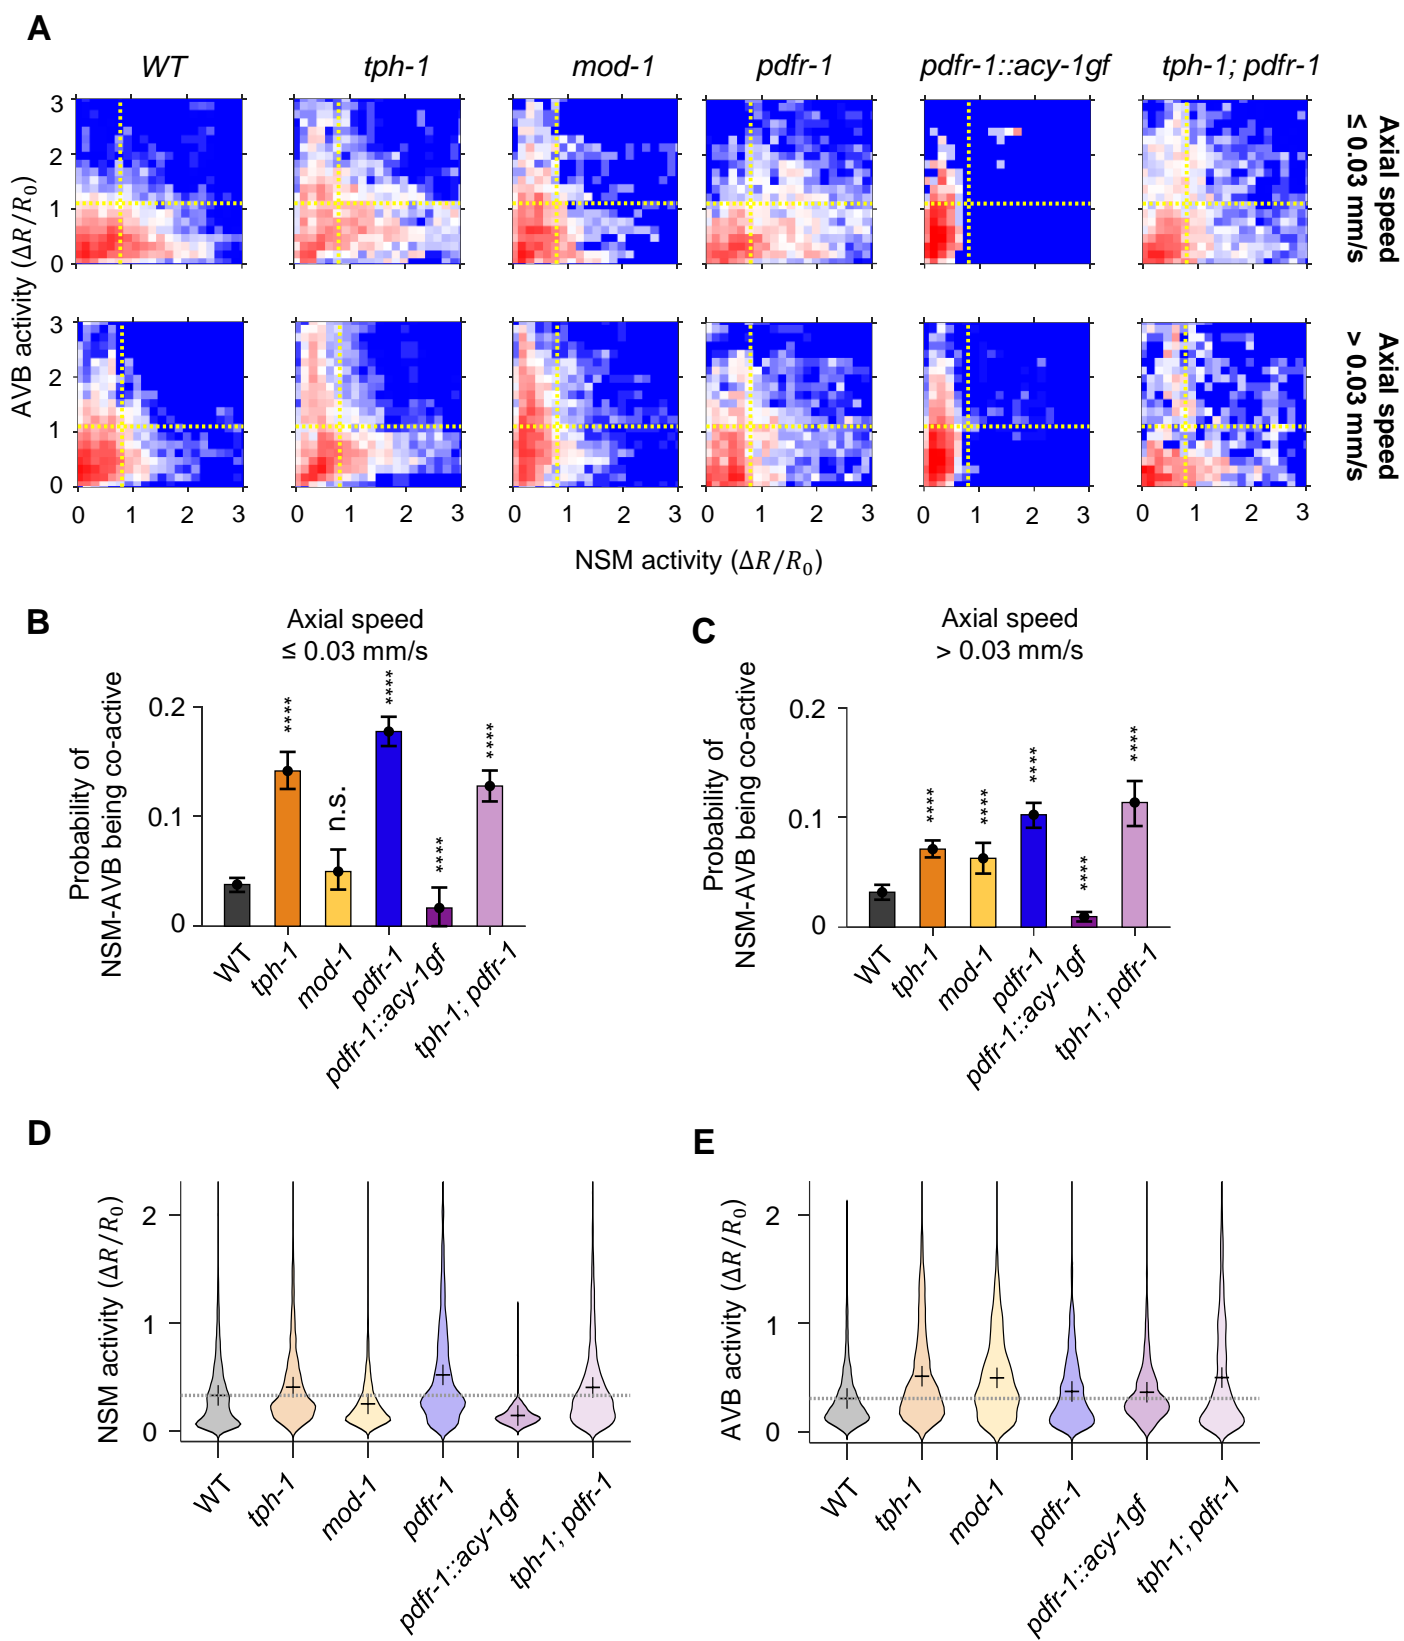

**Figure 4 – Figure Supplement 4**

Supplement: supp [file elife-62889-supp-v1.zip]

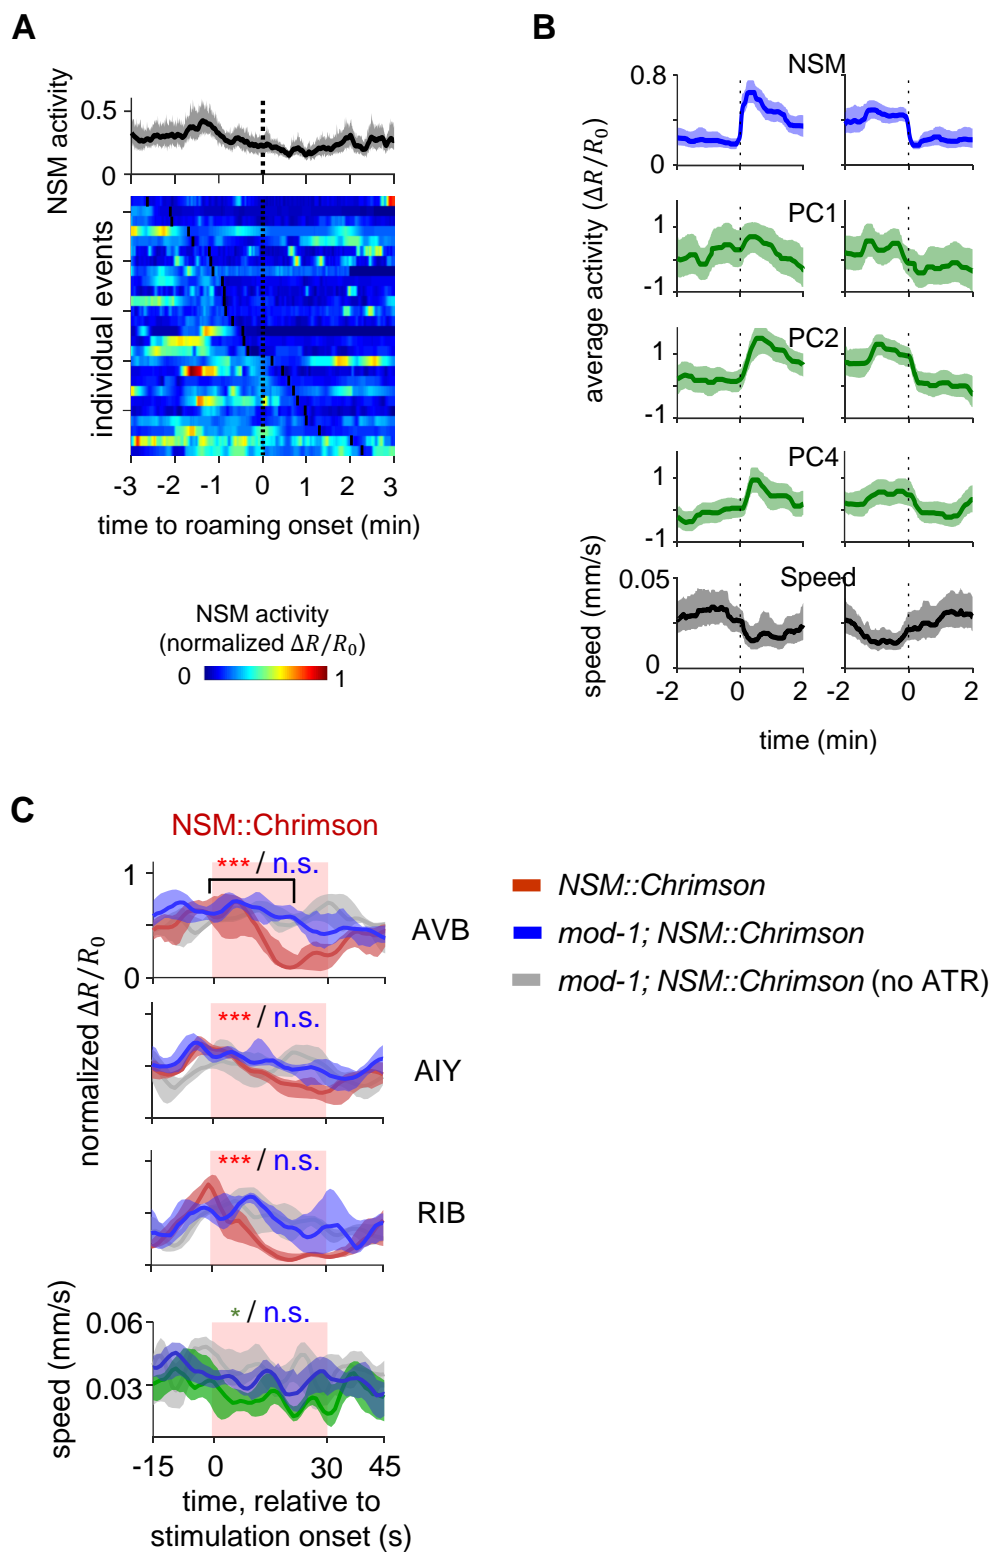

Figure 2 – Figure Supplement 1

Supplement: supp [file elife-62889-supp-v1.zip]

**A**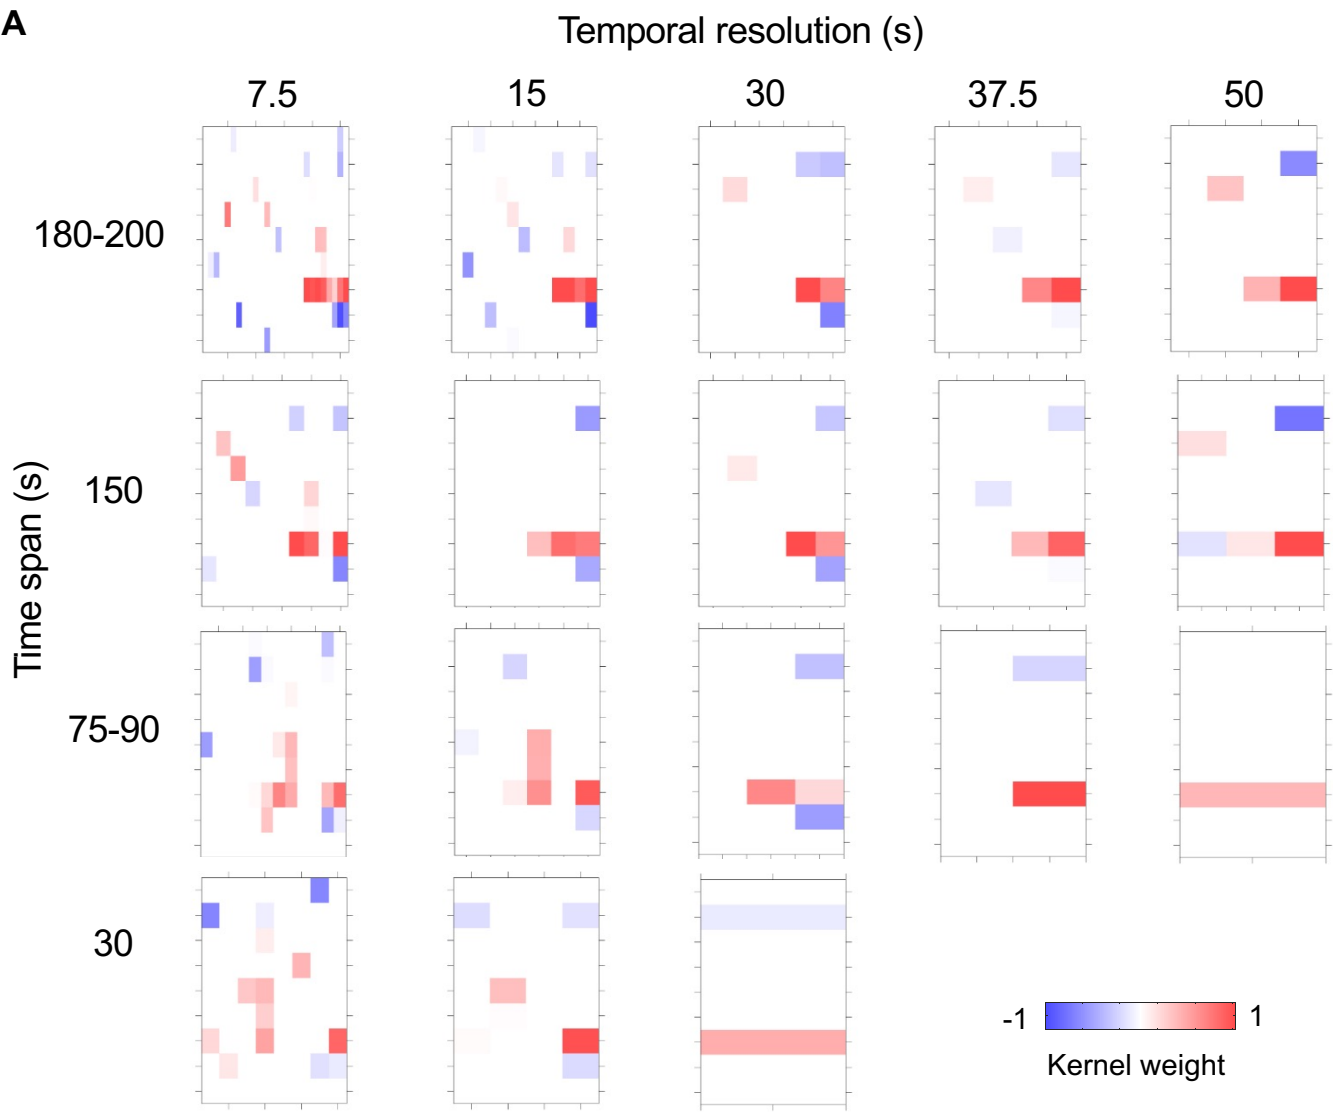**B**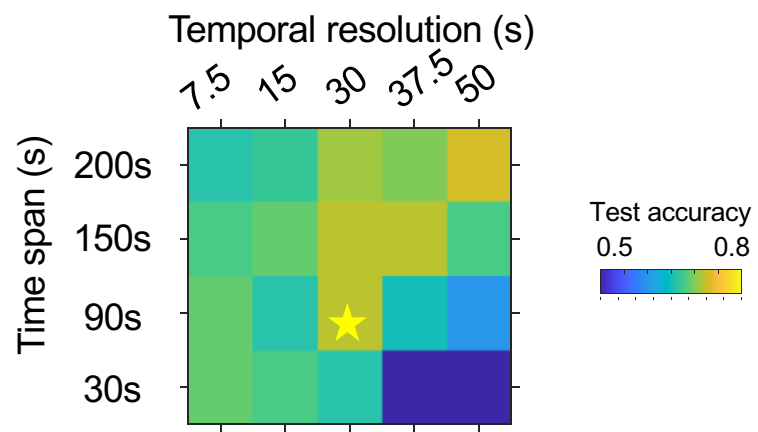

**Figure 5 – Figure Supplement 1**

Supplement: supp [file elife-62889-supp-v1.zip]
